# Supplementary material
Source: Springer Nature journal article supplement (https://www.springermedizin.de/resource/supplementary/12974_2011_438_MOESM1_ESM.pdf/9601288)

(A) Saline

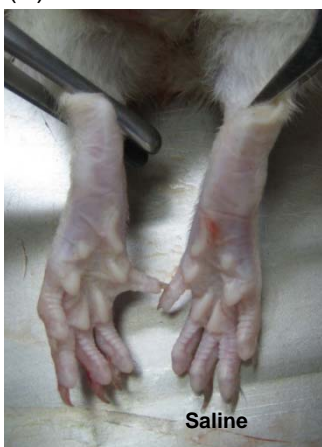

(B) CFA

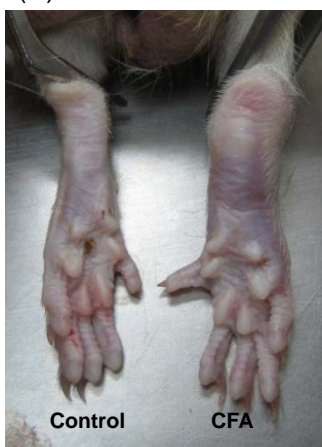(C) TNF- $\alpha$ 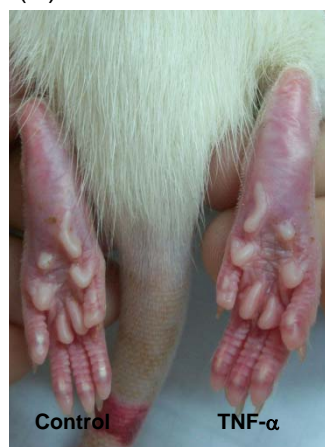

(D) CFA

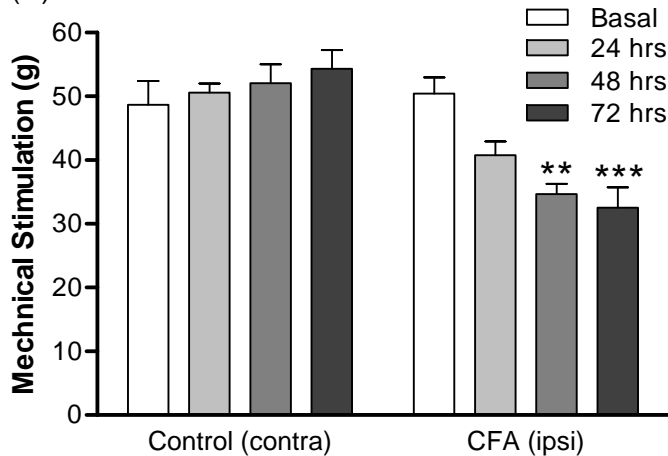(E) TNF- $\alpha$ 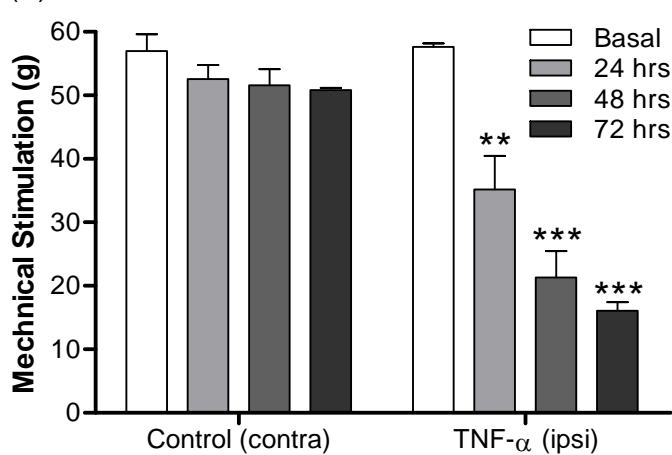

Supplement: MOESM1 [file 9601288]
